1 **A domesticated fungal cultivar recycles its cytoplasmic contents as nutritional**  
2 **rewards for its leafcutter ant farmers**

3

4

5 Caio Ambrosio Leal-Dutra<sup>1\*</sup>, Lok Man Yuen<sup>2</sup>, Pedro Elias Marques,<sup>3</sup> Bruno Augusto Maciel  
6 Guedes<sup>4</sup>, Marta Contreras-Serrano<sup>1</sup>, Jonathan Zvi Shik<sup>1,5</sup>

7

8 <sup>1</sup> Section for Ecology and Evolution, Department of Biology, University of Copenhagen,  
9 Universitetsparken 15, 2100 Copenhagen, Denmark

10 <sup>2</sup> Department of Life Sciences, Imperial College London, London SW7 2AZ, UK

11 <sup>3</sup> Laboratory of Molecular Immunology, Department of Microbiology, Immunology and  
12 Transplantation, Rega Institute, KU Leuven, Leuven, Belgium

13 <sup>4</sup> Departamento de Ciências Básicas da Vida - Universidade Federal de Juiz de Fora, Campus  
14 Governador Valadares, MG, 35020-360, Brasil

15 <sup>5</sup> Smithsonian Tropical Research Institute, Apartado 0843-03092, Balboa, Ancon, Republic of  
16 Panama

17 \* caio@bio.ku.dk

18

19 **Authors email in order:**

20 lok.yuen19@imperial.ac.uk

21 pedro.marques@kuleuven.be

22 bruno.guedes@ufjf.edu.br

23 contrerasserranomarta@gmail.com

24 jonathan.shik@bio.ku.dk

25

26 **Competing Interests**

27 The authors declare no competing interest.

28

29 **Keywords:** autophagy, *Leucoagaricus gongylophorus*, leafcutter ant, gongyliidia, fungus, attini,  
30 attines

31 **ABSTRACT**

32 Leafcutter ants farm a fungal cultivar (*Leucoagaricus gongylophorus*) that converts inedible  
33 vegetation into food that sustains colonies with up to millions of workers. Analogous to edible  
34 fruits of crops domesticated by humans, *L. gongylophorus* has evolved specialized nutritional  
35 rewards—swollen hyphal cells called gongylidia that package metabolites ingested by ant  
36 farmers. Yet, little is known about how gongylidia form, and thus how fungal physiology and ant  
37 provisioning interact to farming performance. We explored the mechanisms governing  
38 gongylidium formation using microscopy imaging of ant-cultivated fungus and controlled *in vitro*  
39 experiments with the cultivar grown in isolation from ant farmers. First, *L. gongylophorus* is  
40 polykaryotic (up to 17 haploid nuclei/cell) and our results suggest intracellular nucleus  
41 distributions govern gongylidium morphology with their absence in expanding edges arresting  
42 apical growth and their presence mediating complex branching patterns. Second, nanoscale  
43 imaging (SEM, TEM) shows that the cultivar recycles its own cellular material (e.g. cytosol,  
44 mitochondria) through a process called ‘autophagy’ and stores the resulting metabolites in  
45 gongylidia. This autophagic pathway is further supported by gongylidium suppression when  
46 isolated fungal cultures are grown on media with autophagy inhibitors, and differential transcript  
47 expression (RNA-seq) analyses showing upregulation of multiple autophagy genes in  
48 gongylidia. We hypothesize that autophagic nutritional reward production is *the* ultimate cultivar  
49 service and reflects a higher-level organismality adaptation enabled by strict symmetric lifetime  
50 commitment between ant farmers and their fungal crop.

51

## 52 Introduction

53 The advent of domesticated agriculture some 10 000 years ago was a turning point for  
54 humans and for the domesticated crops whose derived traits would likely have been  
55 maladaptive in their free-living ancestors [1-3]. Key crop adaptations include whole genome  
56 duplication events (resulting in polyploidy) that can increase functional heterozygosity [4] and  
57 selection for specific regulatory genes that can reduce seed shattering or enhance fruit size,  
58 color, and sweetness [5-8]. Fascinatingly, humans are not the only farmers. Several insect  
59 lineages independently evolved obligate farming systems of fungal cultivars that produce  
60 specialized edible reward structures [9]. However, while human farmers modify growth  
61 environments in well-known ways to maximize crop yield (e.g. adding fertilizers, controlling  
62 watering conditions, etc.), the analogous mechanisms by which insect farmers promote  
63 expression of edible reward structures in fungal cultivars remain poorly understood.

64 The largest-scale insect farmers are the *Atta* leafcutter ants, the crown group of the  
65 fungus-farming 'attine' ant lineage [10, 11]. Despite clear analogies with farming systems of  
66 humans [9], farming by leafcutter ants is fundamentally different because it is 'organismal' in the  
67 sense that it represents a strictly symmetrical obligate mutualistic dependence [12]. Such an  
68 arrangement usually does not allow alternative crops, but does sustain selection for co-  
69 evolutionary integration and higher-level adaptation that cannot evolve when farming practices  
70 are asymmetrically promiscuous [13, 14]. These differences make it interesting to explore how  
71 leafcutter farmers regulate crop productivity, since they can help to: 1) understand the broad  
72 eco-evolutionary success of these naturally selected farming systems and 2) provide nutritional  
73 insights into whether the leafcutter ectosymbiosis has achieved an organismal level of conflict-  
74 free trait evolution typically only seen in lifetime committed endosymbioses (e.g. the  
75 mitochondria-nucleus partnership in eukaryotic cells [15, 16]).

76 A mature rainforest colony of the leafcutter ant *Atta colombica* can have millions of  
77 specialized ants that divide the work of foraging fresh plant fragments and caring for the fungal  
78 cultivar [17]. In this way, colonies convert foraged fragments from hundreds of plant species [18]  
79 into a mulch used to provision their fungal cultivar *Leucoagaricus gongylophorus*. In return, the  
80 cultivar converts inedible plant biomass into edible reward structures called gongylidia, that are  
81 swollen hyphal cells ca. 30  $\mu\text{m}$  in diameter and grow in bundles called staphylae [19-27].

82 Gongylidia are a defining trait of irreversible crop domestication and are unique to the fungal  
83 lineage farmed by leafcutter ants and other higher-neoattine genera including *Trachymyrmex*,  
84 *Sericomyrmex*, *Mycetomoellerius*, and *Paratrachymyrmex* [20, 28, 29].

85 Gongylidia mediate functional integration with their ant symbionts in two main ways.  
86 First, they contain enzymes (e.g., laccases, pectinases, proteases) that ants ingest and then  
87 vector to patches of newly deposited vegetation to catalyze fungus-mediated digestion and  
88 detoxification [30-34]. Second, they contain nutrients (e.g., amino acids, lipids and glycogen)  
89 that are the ants' primary food source [35, 36]. The ability to regulate the quantity and quality of  
90 gongylidia would thus provide clear benefits for the ant farmers. However, the mechanisms  
91 linking substrate provisioning by farming ants and the production of the cultivar's edible yield  
92 have remained poorly known. To better understand these mechanisms, we: 1) visualized the  
93 morphology of gongylidia and staphylae using scanning electron microscopy (SEM), 2)  
94 described the cellular reorganizations that mediate gongylidium formation by combining light,  
95 fluorescence, confocal and transmission electron microscopy (TEM), and 3) used a  
96 transcriptomics experiment to compare gene expression in hyphae and gongylidia to help  
97 resolve the metabolic pathways underlying gongylidia production.

98 We next examined the cellular origins of the edible resources contained in the large  
99 vacuole that fills each gongylidium cell. Previous evidence suggests that *L. gongylophorus*  
100 directly metabolizes provisioned plant fragments to produce these edible resources. First, the  
101 cultivar can metabolize lipids rich in alpha-linolenic acid (18:3) from foraged plant fragments into  
102 linolenic acid (18:2) that is enriched in gongylidia [37]. This synthesized metabolite is thought to  
103 mediate interkingdom communication by eliciting attractive behaviors in ant workers, in contrast  
104 to the precursor 18:3 lipid that elicits antagonistic behaviors [37]. Second, isotopic enrichment  
105 studies have shown that the cultivar quickly (within two days) shunts C and N from provisioned  
106 substrates (glucose and ammonium nitrate, respectively) into edible gongylidia [38]. Third,  
107 different substrate types are associated with increased expression of genes regulating targeted  
108 pathways for nutritional metabolism [21, 36, 39, 40]. However, it is also reasonable to predict  
109 that the diversity of compounds found within gongylidia have a diversity of biochemical origins.

110 Autophagy is a plausible alternative and/or complementary pathway underlying  
111 gongylidia formation that involves the recycling of the cultivar's own metabolic source material

112 and potentially the fine-tuning of its composition. The metabolic pathways for autophagy are  
113 conserved across eukaryotes and are known to mediate development, cellular differentiation  
114 [41-44], and housekeeping [45, 46] in fungal cells. During autophagy, the cultivar's own  
115 cytoplasmic components (*i.e.*, glycogen, proteins, organelles) are incorporated into a vacuole  
116 for enzymatic degradation and the resulting catabolites are then recycled as nutrients to sustain  
117 other cellular processes and produce new cellular components [47, 48]. Initial evidence for  
118 autophagy in *L. gongylophorus* was first obtained in 1979 by Angeli-Papa and Eymé [49] who  
119 used TEM imaging to observe endoplasmic reticulum membranes engulfing mitochondria during  
120 gongylidium formation. However, to our knowledge, this preliminary evidence for autophagic  
121 recycling of the cultivar's own intracellular content during gongylidium formation has not been  
122 subsequently explored.

123 We propose that confirmation of an autophagic pathway(s) would have important  
124 implications for understanding the leafcutter symbiosis since it implies that natural selection has  
125 targeted the farming symbiosis in ways that made provisioning more robust and less dependent  
126 on the variable quality and quantity of foraged vegetation. Specifically, we predict that  
127 autophagic nutrient recycling of cellular contents would: 1) reduce variability in the quality of the  
128 cultivar's nutritional rewards and provide opportunities to optimize the composition of metabolic  
129 source material, 2) constrain the ability of ants to directly regulate cultivar productivity through  
130 their provisioning decisions, and 3) function in a complementary manner to provisioned plant  
131 substrates by providing a stable supply of metabolic precursor substrates during periods of  
132 environmental vegetation shortage.

133 We tested for autophagic gongylidium formation in three ways. First, autophagy  
134 encompasses two main types of cellular recycling mechanisms: 1) macroautophagy in which  
135 cytoplasmic content (*i.e.* cytosolic metabolites and organelles) are sequestered into double-  
136 membraned vesicles that fuse with vacuoles, and 2) microautophagy in which the vacuolar  
137 membrane invaginates and directly engulfs cytoplasmic cargo [47, 48]. We determined whether  
138 and how these autophagic processes influence gongylidium formation by examining organelle  
139 rearrangements in TEM images and tracking experimentally supplied fluorescent-labeled  
140 nutrients using confocal microscopy. Second, we tested whether autophagy is necessary for  
141 gongylidium formation by performing an *in vitro* experiment where the density of staphyla was

142 measured in cultivars grown with known inhibitors and promoters of autophagy in fungal cells.  
143 Third, we tested whether autophagic pathways are differentially expressed in developing  
144 gongylidium cells by performing transcriptomic analyses of the mycelia and differentiated  
145 staphylae of the cultivar when grown under controlled *in vitro* conditions on a standardized  
146 medium without ant farmers.

147

## 148 **Results**

### 149 ***Nutritional reward structures***

150 Each gongylidium cell consists of two sections that we term the bulb (swollen section)  
151 and the filament (elongated section) ([Fig. 1 A](#)). Gongylidia are often connected by intercalary  
152 bulbs (between filaments) and intercalary filaments (between bulbs) ([Fig. 1 B-C](#)) with  
153 multifaceted branching patterns and individual gongylidium cells bearing two or more terminal  
154 bulbs ([Fig. 1 D](#)). Gongylidia bulbs have variable diameters ranging from 12  $\mu\text{m}$  to 50  $\mu\text{m}$  and  
155 variable filament lengths ranging from 40  $\mu\text{m}$  to > 250  $\mu\text{m}$ . We hypothesize that variable bulb  
156 sizes reflect indeterminate growth trajectories of expanding gongylidium cells. All gongylidium  
157 cells also contained at least eight nuclei usually concentrated at the intersection of the bulb and  
158 the filament ([Fig. 1 E](#)) and usually one single vacuole ([Fig. 1 F](#)) that comprised up to half of  
159 each bulb's total volume.

160 Individual staphylae range widely in size, with tens to hundreds of individual  
161 gongylidium cells ([Fig. 1 G](#), [Fig. S1](#)), and always formed on the surface of fungus garden  
162 mycelial matrix where ants can easily detach them from surrounding hyphae. Staphylae also  
163 form in the absence of ants under *in vitro* (Petri dish) growth conditions, but they have the  
164 following key morphological differences compared to those growing in ant-tended fungus  
165 gardens, being: 1) less detachable because they are usually covered by filamentous hyphae, 2)  
166 larger in area and with more individual gongylidium cells, and 3) comprised of several 'burst'  
167 gongylidium cells. We thus propose that under farming conditions, ants harvest staphylae  
168 earlier in their development before vacuoles can produce turgor pressure exceeding the  
169 retaining capacity of their exceptionally thin (ca. 120 to 220 nm) cell walls ([Fig. 1 H](#)).

170

171 ***An autophagic mechanism of gongylidia formation***

172 Microscopy images (TEM, light, fluorescence and confocal) of gongylidium cells  
173 revealed structures that are diagnostic of macroautophagic processes. First, gongylidia were  
174 enriched with long stretches of endoplasmic reticulum that produce double-membraned vesicles  
175 called autophagosomes ([Fig. 2](#)), within which recycling of cellular materials is initiated. We  
176 confirm that autophagosomes contained cytosol ([Fig. 2 A](#)), glycogen ([Fig. 2 B](#)) and mitochondria  
177 ([Fig. 2 C](#)), and predict that other metabolites (*e.g.*, lipids, amino acids, enzymes [28, 30, 37, 40,  
178 64]) are likely abundant, but are too small to be detected with TEM. Second, large numbers of  
179 damaged mitochondria were present in gongylidia and were often associated with endoplasmic  
180 reticulum membranes ([Fig. 2 C](#)) where they were likely destined to be sequestered into  
181 autophagosomes, digested, and recycled into edible metabolites. Third, vacuoles within  
182 gongylidium bulbs often contained single-membraned autophagic bodies ([Fig. 2 D-F](#)). These  
183 vesicles indicate the delivery of metabolites into vacuoles, since they are autophagosomes that  
184 lost their outer membrane after vacuolar fusion. This was confirmed by confocal images  
185 showing that autophagic bodies within gongylidium vacuoles contained fluorescently labeled  
186 sugars from the cultivar's cytosol ([Fig. 2 E-F](#), [Video S1](#)). Given these hallmarks of  
187 macroautophagy (and the lack of evidence for microautophagy), we henceforth use 'autophagy'  
188 to refer to macroautophagy.

189 An autophagic mechanism for gongylidium formation was further supported by  
190 significant *in vitro* treatment effects of chemical autophagy inhibitors on staphyla density  
191 (Kruskal-Wallis:  $H_3 = 34.7$ ,  $p < 0.001$ , [Fig. 3](#)). Pairwise post-hoc comparisons indicated that both  
192 autophagy inhibitors (3-MA and CQ) had significantly reduced staphyla density compared to  
193 both the control (PDA) ( $p_{adj} < 0.001$  and  $p_{adj} = 0.001$ , respectively) and the autophagy-promoter  
194 (RAP) treatment ( $p_{adj} < 0.001$  and  $p_{adj} = 0.026$ , respectively). There was also a significant  
195 treatment effect on mycelial growth area ( $H_3 = 16.3$ ,  $p = 0.001$ ). However, this was due to  
196 differences between 3-MA and all other treatments (PDA:3-MA,  $p_{adj} = 0.004$ ; RAP:3-MA,  $p_{adj} =$   
197  $0.015$ ; CQ:3-MA,  $p_{adj} = 0.001$ ), with no other significant pairwise comparisons ([Fig. S2](#)). Thus,  
198 while both autophagy inhibition treatments resulted in staphyla reduction, it is possible that 3-  
199 MA negatively influenced staphyla density through unknown indirect effects on cultivar

200 performance. The autophagy promotor (RAP) did not significantly increase staphyla density  
201 relative to control (PDA) or either of the autophagy inhibition treatments ([Fig. 3](#)).

202

### 203 ***Transcriptome assembly and autophagy pathway analysis***

204 Using a *de-novo* assembly and a clustering analysis by similarity, we recovered 78,820  
205 transcripts from the *L. gongylophorus* transcriptome of which, 4,755 were differentially  
206 expressed (log<sub>2</sub> fold-change > 1.0, Benjamini–Hochberg adjusted  $P < 0.001$ ) in staphylae (n =  
207 3,011 transcripts) or in non-differentiated mycelia (n = 1,744 transcripts). Of these differentially  
208 expressed transcripts (DETs), 31 were assigned a KEGG orthology term associated with the  
209 yeast autophagy pathway (n = 22 in staphylae, n = 9 in mycelia, Table 1). Several key genes  
210 were upregulated in staphylae that are typically over-transcribed during autophagy [48]. These  
211 include genes (ATG7, ATG8, ATG10) linked to the recruitment of cargo into incipient unclosed  
212 membranes (*i.e.*, phagophores) and mature autophagosomes, as well as genes related to  
213 starvation signaling (Sch9, Tap42, ATG13 and RIM15), vacuole fusion machinery (Ypt7, Mon1  
214 and Vps3), and degradation of autophagic bodies (PRB1 and ATG15) ([Table 1](#), [Fig. S3](#)). In  
215 contrast, the few autophagy-specific genes upregulated in undifferentiated mycelia appear  
216 related to the starvation signaling step of autophagy induction, rather than a fully functioning  
217 autophagy pathway.

218

### 219 **Discussion**

220 Our results provide novel insights into the mechanisms of higher-level homeostatic  
221 integration in a uniquely ‘organismal’ insect-microbe ectosymbiosis. Several lines of evidence  
222 indicate that the fungal cultivar of leafcutter ants uses autophagic recycling to convert its own  
223 cellular material into edible metabolites within specialized nutritional reward structures. First,  
224 nanoscale imaging shows the cellular hallmarks of autophagy (*e.g.* autophagosomes,  
225 autophagic bodies, abundant endoplasmic reticula) and indicates rapid delivery of labeled  
226 cytosol nutrients into gongylidium vacuoles (ca. 30 minutes). Second, experimental suppression  
227 of autophagy suppresses gongylidium density. Third, we find an upregulated autophagy  
228 pathway associated with differentiated gongylidium cells. We hypothesize that this autophagic



229 recycling pathway represents a final domestication step where the cultivar came to  
230 unambiguously prioritize nutritional services to its hosts even at the expense (up to a point) of  
231 its own mycelial health. In this sense, the autophagic recycling pathway expresses an obligately  
232 symmetric commitment between symbionts achieved after the domesticated fungal cultivar lost  
233 the capacity for a free-living existence and became fully integrated into the host colony's germ  
234 line.

235 We further propose that autophagic recycling facilitates homeostasis at higher levels of  
236 organization by stabilizing the quantity and nutritional quality of the cultivar's nutritional rewards  
237 in fluctuating environments. First, the seasonal and spatial availability of preferred plant  
238 fragments may vary in suboptimal ways [65, 66]. Second, foraged plant fragments can contain  
239 key nutrients—but these nutrients can occur in suboptimal ratios and concentrations relative to  
240 the cultivar's intrinsic needs and tolerances [19]. Third, plant fragments contain a wealth of  
241 recalcitrant compounds (e.g. cellulose and lignin) and toxic metabolites that can reduce cultivar  
242 performance [67-70]. During such periods of plant-fragment shortage [71-73], the cultivar may  
243 use autophagic recycling of its own organelles to yield reliably available and chemically  
244 predictable metabolic precursor compounds. Analogous adaptations aimed solely regulating  
245 homeostasis at higher levels of organization are absent from all other ectosymbioses that are  
246 promiscuous by comparison, where the interests of symbionts are not completely aligned, and  
247 partners must screen, sanction, and police to dissuade cheating [74-76].

248 The discovery of autophagic recycling also provides a new lens to interpret well-known  
249 gardening behaviors in leafcutter ants. For instance, gardening ants constantly prune the  
250 cultivar's fungal mycelia and this has been hypothesized to cause mechanical disruptions that  
251 stimulate gongylidium formation [77]. We propose that such pruning behaviors sever hyphal  
252 connections and block the flow of nutrients to newly isolated fungal cells, which in turn induces  
253 gongylidium formation by causing an autophagic response to starvation—which is a common  
254 driver of autophagy in cells [50]. Additionally, previous *in vitro* studies have observed highest  
255 staphylae densities at the lowest nutrient concentrations suggesting a link between staphyla  
256 formation and nutrient depletion [19, 40, 78-80]. Thus, while much research assumes that  
257 cultivar production hinges on a maximized flow of provisioned plant fragments [19, 53, 81], the

258 behaviors linked to targeted nutritional suppression may also be important for the production of  
259 nutritional rewards.

260 While gongylidia-linked autophagic recycling appears common, it likely complements  
261 other nutritional reward production mechanisms. First, leafcutter ants frequently ingest  
262 gongylidia contents (crushing the gongylidia to ingest their cellular content) and vector the  
263 cultivar's enzymes [31, 32, 34, 35] and nutrients [35, 36] as fecal droplets to catalyze  
264 degradation and detoxification of newly deposited plant fragments [30]. Metabolites within these  
265 fecal droplets are assimilated by the cultivar and some subset likely enters biosynthetic  
266 pathways linked to gongylidium formation. Second, key nutrients also appear to derive from  
267 bacterial symbionts (rather than plant fragments or autophagic recycling) [82-84]. For instance,  
268 attine ants have lost the ability to synthesize arginine [80]—and depend on the cultivar's  
269 metabolism to produce this nitrogen-rich amino acid [28]. In turn, the ants have evolved tight  
270 mutualistic associations with specialized bacterial symbionts that convert excess arginine in the  
271 ants' guts into ammonia (the Mollicutes EntAcro1, [84]) that is an N-rich fertilizer vectored by the  
272 ants back to their fungal symbiont. As further evidence that the autophagic-recycling is one of  
273 several mechanisms by which gongylidia fill with metabolites, we observed that staphyla  
274 production was still possible (even though significantly reduced) when autophagy was inhibited  
275 in the *in vitro* experiment. Resolving whether and how these nutritional pathways fluctuate  
276 relative to the specific resource needs of the colony thus represents an important next step.

277

### 278 ***Reconstructing the cellular reorganizations enabling gongylidium formation***

279 The combined evidence we present throughout this study enables us to propose a  
280 complete pathway for gongylidia development ([Fig. 4](#)). Tissue differentiation initiates when a  
281 hyphal cell growing at surface interstices within the fungus garden matrix widens ([Fig. 4 A](#)) and  
282 continues as a vacuole begins expanding in response to autophagic recycling. This process  
283 accelerates autophagosomes fuse with the vacuole and delivers cytoplasmic cargo ([Fig. 4 B](#)).  
284 The location of this vacuole shapes the morphology of developing gongylidia because it  
285 mediates the spatial distributions of the up to 17 [86] haploid nuclei within individual gongylidium  
286 cells by excluding them from the apical tip ([Fig. 4 C](#)).

287 We hypothesize that the obstruction of nuclear migration causes the bulb's balloon-like  
288 expansion by blocking communication between nuclei and the Spitzenkörper—the centralized  
289 machinery for hyphal growth located in the hyphae tip. At the transcript level, a structurally  
290 modified and upregulated transcript carrying a domain associated with microtubule related  
291 proteins [40] may mediate such nuclear migration in association with motor protein complexes  
292 [87-89]. This mechanism would resemble growth dynamics in most filamentous fungi where  
293 nuclei are distributed evenly throughout the hyphal compartment and promote tip elongation by  
294 migrating apically [88, 90]. Further supporting this hypothesis, when nuclei are occasionally  
295 aggregated in different regions of the filament and bulb, they are associated with ramified  
296 branching gongylidia and intercalary bulb formation. Finally, we propose that staphylae arise  
297 from this patchy ramification of tangled gongylidia (Fig. 4 D).

298 These results can also inform our understand of the functional consequences of  
299 polyploidy in the domesticated *L. gongylophorus* cultivar which contains up to 7 distinct  
300 haplotypes per cell [86]. Specifically, key next steps involve moving beyond distributions of  
301 nuclei in gongylidium cells, to testing whether factors like nucleus-specific expression and  
302 nuclear dominance are linked to gongylidium formation. Such a mechanism has recently been  
303 observed in the production of edible reward structures produced by the heterokaryon human-  
304 domesticated champignon fungus (*Agaricus bisporus*), where two distinct nuclear types exhibit  
305 differential expression in distinct tissues during mushroom formation [91]. The convergent  
306 existence of such molecular mechanisms in gongylidium formation would provide a further  
307 means of testing the hypothesis that these nutritional rewards are derived from cystidia [20],  
308 which are modified hypha found in the hymenium of several groups of basidiomycetes [92, 93].  
309 Autophagic induction of cystidia may have provided crucial pre-adaptations harnessed by  
310 natural selection to generate the unique gongylidium reward structures.

311

## 312 **Methods**

### 313 ***Sample acquisition and fungal symbiont isolation***

314 Two colonies of *Atta colombica* (Ac2012-1 and Ac2019-1) were used in this study that  
315 were collected in Soberanía National Park, Panama and thereafter maintained at the University

316 of Copenhagen in a climate-controlled room (25°C, 70% RH, minimal daylight). For microscopy  
317 and imaging, we used staphylae collected directly from the colonies' fungus gardens, and for  
318 the autophagy inhibition experiments and transcriptome sequencing, we used axenic cultures  
319 isolated from the fungal cultivar (*L. gongylophorus*) grown in 90 mm Petri dishes filled with 20 ml  
320 potato dextrose agar (PDA) that were kept in the dark at 25°C.

### 321 ***Imaging morphology of staphyla and gongylidia***

322 Using samples collected directly from the fungus gardens of live leafcutter colonies, we  
323 first used scanning electron microscopy (SEM) to visualize the external morphology of  
324 gongylidia and staphylae. The samples were fixed in PBS with 0.1% Tween 20 and fixatives  
325 (4% glutaraldehyde, 4% formaldehyde) and then dehydrated in an ethanol series (35%, 55%,  
326 75%, 85%, 95%, and 2x in 100%) for 30 minutes per concentration, critical-point dried, coated  
327 with platinum, and imaged on a JSM-840 scanning electron microscope (JEOL, Tokyo, Japan)  
328 at 7.0 kV at the Zoological Museum of the University of Copenhagen. A slight wrinkled  
329 appearance of the surface of gongylidium cells in the resulting SEM images was due to  
330 unavoidable plasmolysis caused by the preparation process.

331 We then used light, fluorescence and confocal microscopy to view the cultivar's internal  
332 morphology (e.g. septa, vacuoles, nuclei, etc.) and examine cellular reorganizations associated  
333 with gongylidium induction. For all imaging, staphylae were first placed in a drop of mounting  
334 solution (dH<sub>2</sub>O, PBS, 3% KOH) on a glass slide. Gongylidia were then separated under a stereo  
335 microscope (16x or 25x magnification) with 0.16-mm diameter acupuncture needles and  
336 stained. For visualization with white light, we placed samples in either 0.1% Congo-red (in 150  
337 mM NaCl) for one minute followed by a wash with 150 mM NaCl, or 1.5% phloxine followed by a  
338 wash with 3% KOH. For nucleus visualization under UV light, we stained samples for 10  
339 minutes using "Vectashield with DAPI" (Vector Laboratories, Burlingame, CA, USA). For  
340 confocal imaging, we stained the staphylae with dextran conjugated with Alexa Fluor 647  
341 (Invitrogen, MA, USA) in the concentration of 100 µg/ml in PBS for 30 minutes and washed  
342 twice in PBS. We then acquired images at magnifications of up to 400x by performing bright-  
343 field, dark-field, phase-contrast, and fluorescence microscopy under an Olympus BX63  
344 microscope (Olympus, Tokyo, Japan). The microstructures were measured and photographed  
345 using a mounted QImaging Retiga 6000 monochrome camera and cellSens Dimension v1.18

346 (Olympus) image-processing software. Confocal images were acquired with a Dragonfly  
347 spinning-disk confocal system (Andor Technology, Belfast, Northern Ireland) equipped with a  
348 25x water-immersion objective. Samples were excited with a 637 nm laser line and  
349 fluorescence was collected with a 698/77 emission filter. Images were processed using FIJI  
350 software.

351 We next used transmission electron microscopy (TEM) to visualize fungal cells with  
352 greater magnification and resolution (i.e. the 500 nm scale). Staphylae were collected from  
353 fragments of intact fungus gardens, fixed in 2% glutaraldehyde in 0.05 M PBS (pH 7.2) and then  
354 post-fixed in 1% w/v OsO<sub>4</sub> with 0.05M K<sub>3</sub>Fe(Cn)<sub>6</sub> in 0.12 M sodium phosphate buffer (pH 7.2) for  
355 2 hr at room temperature. Fixed samples were washed three times in ddH<sub>2</sub>O for 10 minutes and  
356 dehydrated in a series of increasing ethanol concentrations series (70%, 96% and 99.9%). Each  
357 dehydration lasted 15 min and was performed twice per concentration. Samples were then  
358 repeatedly infiltrated for 20 to 40 min with increasing Resin Epon:Propylene oxide ratios (1:3,  
359 1:1, 3:1) and subsequently embedded in 100% Epon and polymerized overnight at 60°C.  
360 Sections of 60 nm thickness were then cut with an Ultracut 7 ultramicrotome (Leica, Vienna,  
361 Austria), collected on copper grids with Formvar supporting membranes, and stained with both  
362 uranyl acetate and lead citrate. These samples were TEM imaged on a CM100 BioTWIN  
363 (Philips, Eindhoven, The Netherlands) at an accelerating voltage of 80 kV. Digital images were  
364 recorded with a side-mounted OSIS Veleta digital slow scan 2 × 2 k CCD camera and the ITEM  
365 software package (Olympus Soft Imaging Corp, Münster, Germany). This sample preparation  
366 and imaging was performed at the Core Facility for Integrated Microscopy at the University of  
367 Copenhagen.

368

### 369 ***Autophagy inhibition assay***

370 We tested the role of autophagy in gongylidium production using an *in vitro* growth  
371 assay with four treatment groups. Autophagy is often initiated in cells when the target of  
372 rapamycin kinase (TOR) is inhibited. Autophagy can thus be induced *in vitro* by adding  
373 rapamycin (RAP) [50] an allosteric TOR inhibitor [48]. Autophagy is often inhibited *in vitro* using  
374 Chloroquine (CQ) or 3-methyladenine (3-MA), as these compounds respectively block

375 autophagosome-vacuole fusion [51] and suppress an enzyme (class III PtdIns3K) required to  
376 initiate autophagosome formation [52]. We compared cultivars grown in the dark for 46 days at  
377 25°C on a baseline Potato Dextrose Agar (PDA) medium containing nutrients known to  
378 maximize cultivar performance [19, 53] (n = 40) with cultivars grown on plates with RAP (n =  
379 27), CQ (n = 28), or 3-MA (n = 30). Briefly, 5-mm diameter fungus plugs from previously isolated  
380 and reinoculated PDA culture were placed in 60-mm Petri dishes containing 10 ml of PDA  
381 (control), PDA + 300 ng/ml rapamycin (Medchem Express, Monmouth Junction, NJ, USA), PDA  
382 + 1.5 mM chloroquine diphosphate (Sigma-Aldrich, St. Louis, Missouri, USA), or PDA + 10 mM  
383 3-MA (Medchem Express). We then photographed plates to measure growth area (mm<sup>2</sup>) using  
384 ImageJ [54] and directly counted the staphylae on these Petri dishes under a stereo microscope  
385 (40x magnification) to quantify staphyla density (number of staphylae/growth area). The  
386 measurement of growth area also enabled assessment of other unintended inhibitory effects of  
387 the added chemicals on cultivar performance. We tested for treatment effects (PDA-Control,  
388 RAP, CQ, 3-MA) on mycelial growth and staphyla density in R version 4.0.2 [55] using a  
389 Kruskal-Wallis test in *rstatix* version 0.7.0 [56] with pairwise post-hoc tests performed using  
390 Dunn's Test in *rstatix* with adjusted p-values calculated using the false-discovery rate method.

391

### 392 ***Transcriptome sequencing, assembly and differential expression analyses***

393 To detect whether upregulated transcripts in staphylae were enriched with autophagy  
394 genes, we first collected staphylae and undifferentiated mycelia from axenic fungal cultures  
395 isolated from an *A. colombica* colony (Ac2012-1) and grown on PDA medium for 30 days as  
396 specified above. From individual Petri dishes, we then used a RNeasy plant mini kit (Qiagen,  
397 Germany) to extract total RNA from differentiated staphyla (pooled 200 staphylae individually  
398 collected with sterile acupuncture needles, n = 5 Petri dishes samples) and undifferentiated  
399 mycelia (adjacent mycelia lacking staphylae, n = 5 Petri dishes samples). Samples were  
400 immediately placed in Qiagen RLC buffer containing 10uM DTT and RNA was then extracted  
401 using the manufacturer-specified protocol. These samples were sent to BGI Europe  
402 (Copenhagen, Denmark) where mRNA enrichment with oligo dT and strand-specific libraries  
403 were constructed using dUTP in the cDNA synthesis. For each sample, between 24 and 30

404 million clean 100bp paired-end reads were generated by a DNBseq-G400 sequencer (MGI  
405 Tech, Shenzhen, China).

406 We used pooled clean reads from all samples (staphylae and mycelia) to assemble a *de*  
407 *novo* transcriptome using Trinity-v2.12.0 [57] and default settings with the addition of Jaccard-  
408 clip and strand-specific (SS) options, to reduce the generation of chimeric transcripts and  
409 account for the SS library construction, respectively. All downstream tools accounted for SS  
410 sequences (analyzing only positive strands or sequences). Using CD-HIT [58] to cluster highly  
411 similar sequences (98% similarity), we reduced the assembly from 93,470 to 78,820 transcripts  
412 ranging from 187 to 26,203 bp. We used Trinity built-in pipelines to first estimate transcript  
413 abundance with RSEM v1.3.1 [59] and then build a transcript expression matrix. We then  
414 performed a differential expression analysis with a trinity built-in pipeline using DESeq2 [60]  
415 setting the analysis to filter for the differentially expressed transcripts (DETs) with  $\log_2$  fold  
416 change  $> 1.0$  and  $P < 0.001$ . To annotate the DETs, we first converted transcripts to amino acid  
417 sequences using Transdecoder (<https://github.com/TransDecoder/TransDecoder>) to identify the  
418 longest open read frames (orfs) per transcript and translate them into amino acid sequences,  
419 and then annotated the DETs with KEGG database [61] using the online tools BlastKOALA,  
420 GhostKOALA [62] and KofamKOALA [63].

421

#### 422 **Data availability**

423 All the generated RNA-seq datasets are available at NCBI under the BioProject ID  
424 PRJNAXXXXXX.

425

#### 426 **Acknowledgements**

427 This study was funded by a European Research Council Starting Grant (ELEVATE:  
428 ERC-2017-STG-757810) to JZS. Benjamin Conlon assisted with statistical analyses. Useful  
429 comments were provided by Jacobus Boomsma, Gareth W. Griffith and Pedro Elias  
430 Marques. The images recreating stages of gongylidium formation in Figure 4 were  
431 produced by Damond Kylo. Assistance with transmission and scanning electron  
432 microscopies was provided by the Core Facility for Integrated Microscopy, Faculty of

433 Health and Medical Sciences, and the Zoological Museum, both at University of  
434 Copenhagen. Data processing and analysis were performed using Computerome, the National  
435 Life Science Supercomputer at DTU ([www.computerome.dk](http://www.computerome.dk)). Sylvia Mathiasen and Rasmus  
436 Larsen provided general laboratory assistance.



437 **References**

- 438 1. Solberg MF, Robertsen G, Sundt-Hansen LE, Hindar K, Glover KA.  
439 Domestication leads to increased predation susceptibility. *Scientific Reports*.  
440 2020;10(1):1929.
- 441 2. Milla R, Osborne CP, Turcotte MM, Violle C. Plant domestication through an  
442 ecological lens. *Trends Ecol Evol*. 2015;30(8):463-9.
- 443 3. Gering E, Incorvaia D, Henriksen R, Conner J, Getty T, Wright D. Getting Back  
444 to Nature: Feralization in Animals and Plants. *Trends Ecol Evol*. 2019;34(12):1137-51.
- 445 4. Comai L. The advantages and disadvantages of being polyploid. *Nature*  
446 *Reviews Genetics*. 2005;6(11):836-46.
- 447 5. Stetter MG, Gates DJ, Mei W, Ross-Ibarra J. How to make a domesticate. *Curr*  
448 *Biol*. 2017;27(17):R896-R900.
- 449 6. Edger PP, Poorten TJ, VanBuren R, Hardigan MA, Colle M, McKain MR, et al.  
450 Origin and evolution of the octoploid strawberry genome. *Nat Genet*. 2019;51(3):541-7.
- 451 7. Piperno DR. Patterns, Process, and New Developments  
452 The Origins of Plant Cultivation and Domestication in the New World Tropics.  
453 *CurrAnthr*. 2011;52(S4):S453-S70.
- 454 8. Renner SS, Wu S, Pérez-Escobar OA, Silber MV, Fei Z, Chomicki G. A  
455 chromosome-level genome of a Kordofan melon illuminates the origin of domesticated  
456 watermelons. *Proc Natl Acad Sci*. 2021;118(23):e2101486118.
- 457 9. Mueller UG, Gerardo NM, Aanen DK, Six DL, Schultz TR. The evolution of  
458 agriculture in insects. *Annual Review of Ecology, Evolution, and Systematics*.  
459 2005:563-95.
- 460 10. Schultz TR, Brady SG. Major evolutionary transitions in ant agriculture. *Proc*  
461 *Natl Acad Sci*. 2008;105(14):5435-40.
- 462 11. Barrera CA, Sosa-Calvo J, Schultz TR, Rabeling C, Bacci Jr M. Phylogenomic  
463 reconstruction reveals new insights into the evolution and biogeography of *Atta* leaf-  
464 cutting ants (Hymenoptera: Formicidae). *Syst Entomol*. 2021;n/a(n/a).
- 465 12. Boomsma JJ. Lifetime Commitment between Social Insect Families and Their  
466 Fungal Cultivars Complicates Comparisons with Human Farming. In: Schultz TR,  
467 Gawne R, Peregrine PN, editors. *The Convergent Evolution of Agriculture in Humans*  
468 *and Insects*. Vienna Series in Theoretical Biology. Cambridge, Massachusetts: MIT  
469 Press; 2022. p. 73-86.
- 470 13. Frank SA. Host-symbiont conflict over the mixing of symbiotic lineages.  
471 *Proceedings of the Royal Society of London Series B: Biological Sciences*.  
472 1996;263(1368):339-44.
- 473 14. Axelrod R, Hamilton WD. The Evolution of Cooperation. *Science*.  
474 1981;211(4489):1390-6.
- 475 15. Boomsma JJ, Gawne R. Superorganismality and caste differentiation as points  
476 of no return: how the major evolutionary transitions were lost in translation. *Biological*  
477 *Reviews*. 2018;93(1):28-54.
- 478 16. Leigh Jr EG. The evolution of mutualism. *J Evol Biol*. 2010;23(12):2507-28.
- 479 17. Hölldobler B, Wilson EO. *The leafcutter ants: civilization by instinct*. New York:  
480 W. W Norton & Co.; 2011.

- 481 18. Wirth R, Herz H, Ryel RJ, Beyschlag W, Hölldobler B. Herbivory of Leaf-Cutting  
482 Ants. Germany: Springer-Verlag Berlin Heidelberg; 2003. 233 p.
- 483 19. Crumiere AJJ, James A, Lannes P, Mallett S, Michelsen A, Rinnan R, et al. The  
484 multidimensional nutritional niche of fungus-cultivar provisioning in free-ranging  
485 colonies of a neotropical leafcutter ant. *Ecol Lett*. 2021;24(11):2439-51.
- 486 20. Mueller UG, Schultz TR, Currie CR, Adams RM, Malloch D. The origin of the  
487 attine ant-fungus mutualism. *Q Rev Biol*. 2001:169-97.
- 488 21. Quinlan RJ, Cherrett JM. The role of fungus in the diet of the leaf-cutting ant  
489 *Atta cephalotes* (L.). *Ecol Entomol*. 1979;4(2):151-60.
- 490 22. Weber NA. Dry season adaptations of fungus-growing ants and their fungi. *The*  
491 *Anatomical Record*. 1957;128(3):1.
- 492 23. Wheeler WM. The fungus-growing ants of North America. *Bulletin of the*  
493 *American Museum of Natural History*. 1907;23:139.
- 494 24. Möller A. Die Pilzgärten einiger südamerikanischer Ameisen. A.F.W. S, editor.  
495 Jena: Gustav Fischer Verlag; 1893.
- 496 25. Powell RJ. The influence of substrate quality on fungus cultivation by some  
497 Attine ants: University of Exeter; 1984.
- 498 26. Weber NA. Fungus-growing ants. *Science*. 1966;153(3736):587-604.
- 499 27. Swingle WT. Fungus Gardens in the Nest of an Ant (*Atta tardigrada* Buckl.)  
500 near Washington. *Proc Am Assoc Adv Sci*. 1896;44th Meet.:2.
- 501 28. Nygaard S, Hu H, Li C, Schiøtt M, Chen Z, Yang Z, et al. Reciprocal genomic  
502 evolution in the ant–fungus agricultural symbiosis. *Nat Commun*. 2016;7:12233.
- 503 29. Solomon SE, Rabeling C, Sosa-Calvo J, Lopes CT, Rodrigues A, Vasconcelos  
504 HL, et al. The molecular phylogenetics of *Trachymyrmex* Forel ants and their fungal  
505 cultivars provide insights into the origin and coevolutionary history of ‘higher-attine’ ant  
506 agriculture. *Syst Entomol*. 2019;44(4):939-56.
- 507 30. De Fine Licht HH, Schiøtt M, Rogowska-Wrzesinska A, Nygaard S, Roepstorff  
508 P, Boomsma JJ. Laccase detoxification mediates the nutritional alliance between leaf-  
509 cutting ants and fungus-garden symbionts. *Proc Natl Acad Sci*. 2013;110(2):583-7.
- 510 31. Kooij PW, Rogowska-Wrzesinska A, Hoffmann D, Roepstorff P, Boomsma JJ,  
511 Schiøtt M. *Leucoagaricus gongylophorus* uses leaf-cutting ants to vector proteolytic  
512 enzymes towards new plant substrate. *ISME J*. 2014;8(5):1032-40.
- 513 32. Schiøtt M, Rogowska-Wrzesinska A, Roepstorff P, Boomsma JJ. Leaf-cutting  
514 ant fungi produce cell wall degrading pectinase complexes reminiscent of  
515 phytopathogenic fungi. *BMC Biol*. 2010;8(1):156.
- 516 33. Aylward FO, Khadempour L, Tremmel DM, McDonald BR, Nicora CD, Wu S, et  
517 al. Enrichment and Broad Representation of Plant Biomass-Degrading Enzymes in the  
518 Specialized Hyphal Swellings of *Leucoagaricus gongylophorus*, the Fungal Symbiont of  
519 Leaf-Cutter Ants. *PLOS ONE*. 2015;10(8):e0134752.
- 520 34. Schiøtt M, Boomsma JJ. Proteomics reveals synergy between biomass  
521 degrading enzymes and inorganic Fenton chemistry in leaf-cutting ant colonies. *eLife*.  
522 2021;10:e61816.
- 523 35. Martin MM. The Biochemical Basis of the Fungus-Attine Ant Symbiosis.  
524 *Science*. 1970;169(3940):16.
- 525 36. Martin MM, Martin JS. The biochemical basis for the symbiosis between the  
526 ant, *Atta colombica* tonsipes, and its food fungus. *J Insect Physiol*. 1970;16(1):109-19.

- 527 37. Khadempour L, Kyle JE, Webb-Robertson B-JM, Nicora CD, Smith FB, Smith  
528 RD, et al. From Plants to Ants: Fungal Modification of Leaf Lipids for Nutrition and  
529 Communication in the Leaf-Cutter Ant Fungal Garden Ecosystem. *mSystems*.  
530 2021;6(2):e01307-20.
- 531 38. Shik JZ, Rytter W, Arnan X, Michelsen A. Disentangling nutritional pathways  
532 linking leafcutter ants and their co-evolved fungal symbionts using stable isotopes.  
533 *Ecology*. 2018;99(9):1999-2009.
- 534 39. Martin MM, Carman RM, MacConnell JG. Nutrients Derived from the Fungus  
535 Cultured by the Fungus-Growing Ant *Atta colombica* tonsipes1. *Ann Entomol Soc Am*.  
536 1969;62(1):11-3.
- 537 40. De Fine Licht HH, Boomsma JJ, Tunlid A. Symbiotic adaptations in the fungal  
538 cultivar of leaf-cutting ants. *Nat Commun*. 2014;5(1):5675.
- 539 41. Kikuma T, Ohneda M, Arioka M, Kitamoto K. Functional Analysis of the *ATG8*  
540 Homologue *Aoatg8* and Role of Autophagy in Differentiation and Germination in  
541 *Aspergillus oryzae*. *Eukaryot Cell*. 2006;5(8):1328-36.
- 542 42. Pinan-Lucarré B, Paoletti M, Dementhon K, Coulary-Salin B, Clavé C.  
543 Autophagy is induced during cell death by incompatibility and is essential for  
544 differentiation in the filamentous fungus *Podospora anserina*. *Mol Microbiol*.  
545 2003;47(2):321-33.
- 546 43. Liu X-H, Gao H-M, Xu F, Lu J-P, Devenish RJ, Lin F-C. Autophagy vitalizes the  
547 pathogenicity of pathogenic fungi. *Autophagy*. 2012;8(10):1415-25.
- 548 44. Kües U, Navarro-González M. How do Agaricomycetes shape their fruiting  
549 bodies? 1. Morphological aspects of development. *Fungal Biology Reviews*.  
550 2015;29(2):63-97.
- 551 45. Elander PH, Minina EA, Bozhkov PV. Autophagy in turnover of lipid stores:  
552 trans-kingdom comparison. *J Exp Bot*. 2017;69(6):1301-11.
- 553 46. Bartoszewska M, Kiel JA. The role of macroautophagy in development of  
554 filamentous fungi. *Antioxid Redox Signal*. 2011;14(11):2271-87.
- 555 47. Levine B, Klionsky DJ. Development by Self-Digestion: Molecular Mechanisms  
556 and Biological Functions of Autophagy. *Dev Cell*. 2004;6(4):463-77.
- 557 48. Klionsky DJ, Abdel-Aziz AK, Abdelfatah S, Abdellatif M, Abdoli A, Abel S, et al.  
558 Guidelines for the use and interpretation of assays for monitoring autophagy (4th  
559 edition)1. *Autophagy*. 2021;17(1):1-382.
- 560 49. Angeli-Papa J, Eymé J. Le champignon cultivé par la "fourmi-manioc",  
561 *Acromyrmex octospinosus* Reich en Guadeloupe; résultats préliminaires sur le  
562 mycélium en culture pure et sur l'infrastructure des hyphes. *C r hebdomadaire des séances de l'Académie des sciences et belles-lettres*.  
563 Paris D 1979;281:21-4.
- 564 50. Noda T, Ohsumi Y. Tor, a Phosphatidylinositol Kinase Homologue, Controls  
565 Autophagy in Yeast\*. *J Biol Chem*. 1998;273(7):3963-6.
- 566 51. Mauthe M, Orhon I, Rocchi C, Zhou X, Luhr M, Hijlkema K-J, et al. Chloroquine  
567 inhibits autophagic flux by decreasing autophagosome-lysosome fusion. *Autophagy*.  
568 2018;14(8):1435-55.
- 569 52. Wu Y-T, Tan H-L, Shui G, Bauvy C, Huang Q, Wenk MR, et al. Dual Role of 3-  
570 Methyladenine in Modulation of Autophagy via Different Temporal Patterns of Inhibition  
571 on Class I and III Phosphoinositide 3-Kinase\*. *J Biol Chem*. 2010;285(14):10850-61.

- 572 53. Shik JZ, Kooij PW, Donoso DA, Santos JC, Gomez EB, Franco M, et al.  
573 Nutritional niches reveal fundamental domestication trade-offs in fungus-farming ants.  
574 *Nat Ecol Evol.* 2021;5(1):122-34.
- 575 54. Schneider CA, Rasband WS, Eliceiri KW. NIH Image to ImageJ: 25 years of  
576 image analysis. *Nat Methods.* 2012;9(7):671-5.
- 577 55. R Core Team. R: a language and environment for statistical computing.  
578 Foundation for Statistical Computing. Vienna, Austria 2020.
- 579 56. Kassambara A. rstatix: Pipe-Friendly Framework for Basic Statistical Tests. R  
580 package version 0.7.0. ed2021.
- 581 57. Grabherr MG, Haas BJ, Yassour M, Levin JZ, Thompson DA, Amit I, et al. Full-  
582 length transcriptome assembly from RNA-Seq data without a reference genome. *Nat*  
583 *Biotechnol.* 2011;29(7):644-52.
- 584 58. Fu L, Niu B, Zhu Z, Wu S, Li W. CD-HIT: accelerated for clustering the next-  
585 generation sequencing data. *Bioinformatics.* 2012;28(23):3150-2.
- 586 59. Li B, Dewey CN. RSEM: accurate transcript quantification from RNA-Seq data  
587 with or without a reference genome. *BMC Bioinformatics.* 2011;12(1):323.
- 588 60. Love MI, Huber W, Anders S. Moderated estimation of fold change and  
589 dispersion for RNA-seq data with DESeq2. *Genome Biology.* 2014;15(12):550.
- 590 61. Kanehisa M, Goto S. KEGG: Kyoto Encyclopedia of Genes and Genomes.  
591 *Nucleic Acids Res.* 2000;28(1):27-30.
- 592 62. Kanehisa M, Sato Y, Morishima K. BlastKOALA and GhostKOALA: KEGG  
593 Tools for Functional Characterization of Genome and Metagenome Sequences. *J Mol*  
594 *Biol.* 2016;428(4):726-31.
- 595 63. Aramaki T, Blanc-Mathieu R, Endo H, Ohkubo K, Kanehisa M, Goto S, et al.  
596 KofamKOALA: KEGG Ortholog assignment based on profile HMM and adaptive score  
597 threshold. *Bioinformatics.* 2019;36(7):2251-2.
- 598 64. Grell MN, Linde T, Nygaard S, Nielsen KL, Boomsma JJ, Lange L. The fungal  
599 symbiont of *Acromyrmex* leaf-cutting ants expresses the full spectrum of genes to  
600 degrade cellulose and other plant cell wall polysaccharides. *BMC Genomics.* 2013;14.
- 601 65. Mueller UG, Mikheyev AS, Hong E, Sen R, Warren DL, Solomon SE, et al.  
602 Evolution of cold-tolerant fungal symbionts permits winter fungiculture by leafcutter ants  
603 at the northern frontier of a tropical ant–fungus symbiosis. *Proc Natl Acad Sci.*  
604 2011;108(10):4053-6.
- 605 66. Nichols-Orians CM. Environmentally Induced Differences in Plant Traits:  
606 Consequences for Susceptibility to a Leaf-Cutter Ant. *Ecology.* 1991;72(5):1609-23.
- 607 67. Howard JJ. Leafcutting Ant Diet Selection: The Role of Nutrients, Water, and  
608 Secondary Chemistry. *Ecology.* 1987;68(3):503-15.
- 609 68. Howard JJ. Leafcutting and Diet Selection: Relative Influence of Leaf Chemistry  
610 and Physical Features. *Ecology.* 1988;69(1):250-60.
- 611 69. Nichols-Orians CM, Schultz JC. Interactions among leaf toughness, chemistry,  
612 and harvesting by attine ants. *Ecol Entomol.* 1990;15(3):311-20.
- 613 70. Crumiere AJJ, Mallett S, Michelsen A, Rinnan R, Shik JZ. Nutritional challenges  
614 of feeding a mutualist: Testing for a nutrient-toxin tradeoff in fungus-farming leafcutter  
615 ants. *Ecology.* 2022;103(6):e3684.

- 616 71. Mundim FM, Costa AN, Vasconcelos HL. Leaf nutrient content and host plant  
617 selection by leaf-cutter ants, *Atta laevigata*, in a Neotropical savanna. *Entomol Exp*  
618 *Appl.* 2009;130(1):47-54.
- 619 72. Berish CW. Leaf-Cutting Ants (*Atta cephalotes*) Select Nitrogen-Rich Forage.  
620 *The American Midland Naturalist.* 1986;115(2):268-76.
- 621 73. Howard JJ, Cazin J, Wiemer DF. Toxicity of terpenoid deterrents to the  
622 leafcutting ant *Atta cephalotes* and its mutualistic fungus. *J Chem Ecol.* 1988;14(1):59-  
623 69.
- 624 74. Jandér KC, Herre EA. Host sanctions and pollinator cheating in the fig tree-fig  
625 wasp mutualism. *Proc R Soc B.* 2010;277(1687):1481-8.
- 626 75. Heil M, McKey D. Protective Ant-Plant Interactions as Model Systems in  
627 Ecological and Evolutionary Research. *Annual Review of Ecology, Evolution, and*  
628 *Systematics.* 2003;34(1):425-553.
- 629 76. Kiers ET, Rousseau RA, West SA, Denison RF. Host sanctions and the  
630 legume–rhizobium mutualism. *Nature.* 2003;425(6953):78-81.
- 631 77. Bass M, Cherrett JM. Leaf-Cutting Ants (Formicidae, Attini) Prune Their Fungus  
632 to Increase and Direct Its Productivity. *Funct Ecol.* 1996;10(1):55-61.
- 633 78. Schiøtt M, De Fine Licht HH, Lange L, Boomsma JJ. Towards a molecular  
634 understanding of symbiont function: Identification of a fungal gene for the degradation  
635 of xylan in the fungus gardens of leaf-cutting ants. *BMC Microbiol.* 2008;8(1):40.
- 636 79. Moller IE, De Fine Licht HH, Harholt J, Willats WGT, Boomsma JJ. The  
637 Dynamics of Plant Cell-Wall Polysaccharide Decomposition in Leaf-Cutting Ant Fungus  
638 Gardens. *PLOS ONE.* 2011;6(3):e17506.
- 639 80. Nygaard S, Zhang G, Schiøtt M, Li C, Wurm Y, Hu H, et al. The genome of the  
640 leaf-cutting ant *Acromyrmex echinator* suggests key adaptations to advanced social  
641 life and fungus farming. *Genome Res.* 2011;21(8):1339-48.
- 642 81. Shik JZ, Gomez EB, Kooij PW, Santos JC, Wcislo WT, Boomsma JJ. Nutrition  
643 mediates the expression of cultivar–farmer conflict in a fungus-growing ant. *Proc Natl*  
644 *Acad Sci.* 2016;113(36):10121-6.
- 645 82. Pinto-Tomás AA, Anderson MA, Suen G, Stevenson DM, Chu FST, Cleland  
646 WW, et al. Symbiotic Nitrogen Fixation in the Fungus Gardens of Leaf-Cutter Ants.  
647 *Science.* 2009;326(5956):1120-3.
- 648 83. Khadempour L, Fan H, Keefover-Ring K, Carlos-Shanley C, Nagamoto NS,  
649 Dam MA, et al. Metagenomics Reveals Diet-Specific Specialization of Bacterial  
650 Communities in Fungus Gardens of Grass- and Dicot-Cutter Ants. *Frontiers in*  
651 *Microbiology.* 2020;11.
- 652 84. Sapountzis P, Zhukova M, Shik JZ, Schiøtt M, Boomsma JJ. Reconstructing the  
653 functions of endosymbiotic Mollicutes in fungus-growing ants. *eLife.* 2018;7:e39209.
- 654 85. Zhukova M, Sapountzis P, Schiøtt M, Boomsma J. Phylogenomic analysis and  
655 metabolic role reconstruction of mutualistic Rhizobiales hindgut symbionts of  
656 *Acromyrmex* leaf-cutting ants. *FEMS Microbiol Ecol.* In press.
- 657 86. Kooij PW, Aanen DK, Schiøtt M, Boomsma JJ. Evolutionarily advanced ant  
658 farmers rear polyploid fungal crops. *J Evol Biol.* 2015;28(11):1911-24.
- 659 87. Xiang X, Beckwith SM, Morris NR. Cytoplasmic dynein is involved in nuclear  
660 migration in *Aspergillus nidulans*. *Proc Natl Acad Sci.* 1994;91(6):2100-4.
- 661 88. Xiang X. Nuclear movement in fungi. *Semin Cell Dev Biol.* 2018;82:3-16.



- 662 89. Yamamoto A, Hiraoka Y. Cytoplasmic dynein in fungi: insights from nuclear  
663 migration. *J Cell Sci.* 2003;116(22):4501-12.
- 664 90. Plamann M, Minke PF, Tinsley JH, Bruno KS. Cytoplasmic dynein and actin-  
665 related protein Arp1 are required for normal nuclear distribution in filamentous fungi. *J*  
666 *Cell Biol.* 1994;127(1):139-49.
- 667 91. Gehrman T, Pelkmans JF, Ohm RA, Vos AM, Sonnenberg ASM, Baars JJP, et  
668 al. Nucleus-specific expression in the multinuclear mushroom-forming fungus *Agaricus*  
669 *bisporus* reveals different nuclear regulatory programs. *Proc Natl Acad Sci U S A.*  
670 2018;115(17):4429-34.
- 671 92. Stalpers JA. Identification of wood-inhabiting Aphyllophorales in pure culture.  
672 *Studies in Mycology.* 1978;16:248.
- 673 93. Nobles MK. Identification of cultures of wood-inhabiting Hymenomyces.  
674 *Canadian Journal of Botany.* 1965;43(9):1097-139.
- 675

676 **Figures and table**

677

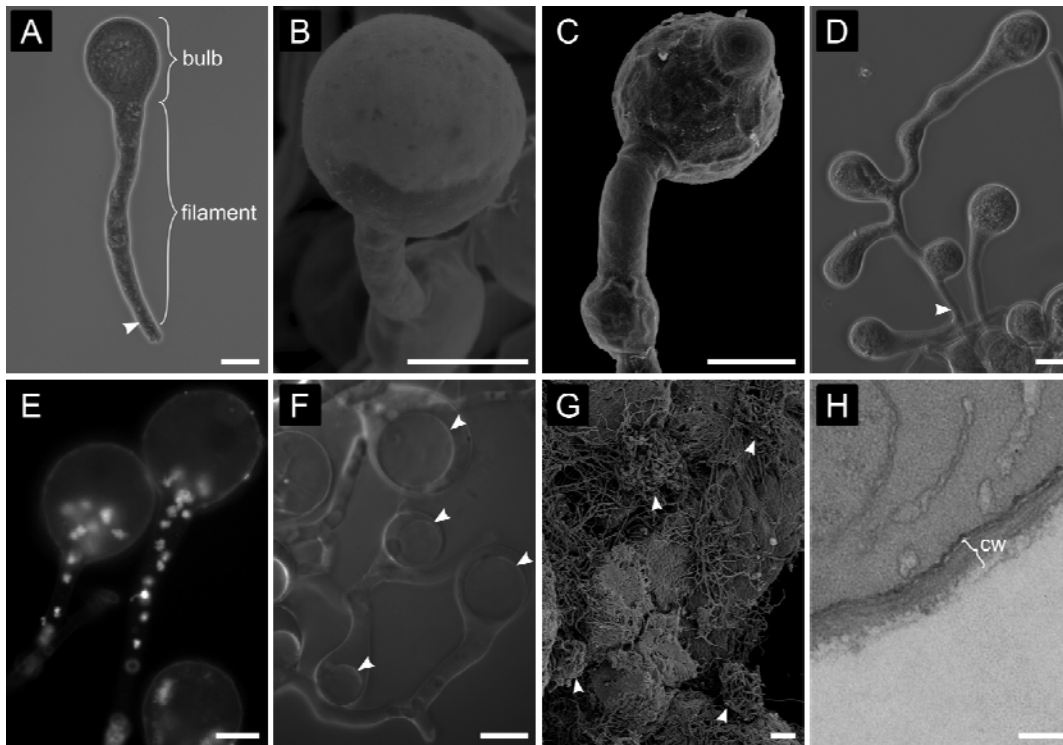

678

679 **Fig. 1: The *Leucoagaricus gongylophorus* fungal cultivar produces gongylidia as**  
680 **specialized nutritional reward structures for leafcutter ants. A-C)** Gongylidium cells are  
681 typically depicted as a bulb at the end of a filament in the apical hyphal compartment separated  
682 by a septum (arrowheads). **D)** Gongylidia frequently exhibit more complex branching, with bulbs  
683 between filaments or in lateral branches of single hyphal cells delimited by septa. **E)** Individual  
684 gongylidium cells are polykaryotic [86], meaning that they have many haploid nuclei (white  
685 dots). Here, we show that in mature non-branching gongylidium cells, these nuclei occur at the  
686 base of the bulb (below a single large vacuole) and in the filament. Nuclei were visualized using  
687 DAPI staining. **F)** Each gongylidium cell contains a large vacuole (arrowheads). **G)** Staphyla  
688 grow in discrete patches at the surface of the fungus garden matrix in the middle garden  
689 stratum (arrowheads). **H)** Gongylidium cells have thin cell walls ranging from 120 to 220 nm  
690 (cw). Images produced by light microscopy (panels A, D, F), fluorescence microscopy stained  
691 with DAPI (panel E), SEM (panels B, C, G) and TEM (panel H). Scale bars: A-F = 20  $\mu$ m, G =  
692 100  $\mu$ m, H = 200 nm.

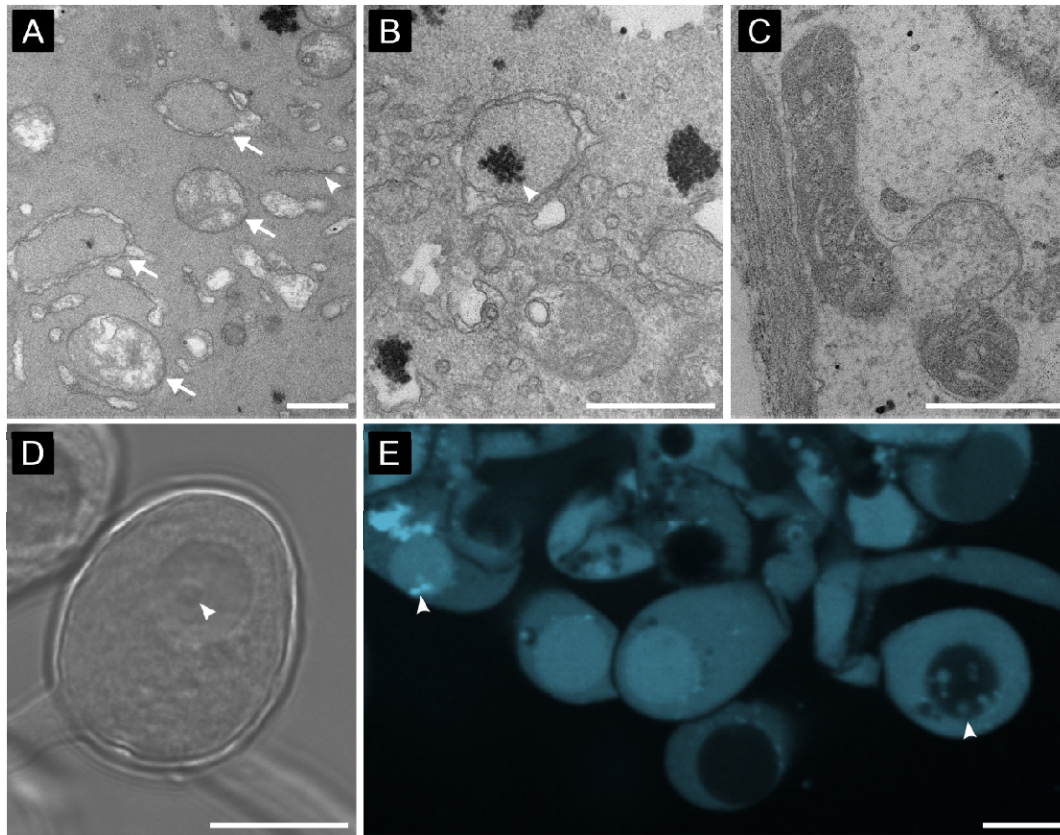

693

694 **Fig. 2: Autophagic recycling of cellular material. A)** The autophagosomes that are diagnostic  
695 of autophagy are vesicles with double-layered membranes (arrows) and are produced by  
696 stretches of endoplasmic reticulum membranes (arrowheads). **B)** Autophagosomes sequester  
697 cytoplasmic components including glycogen (arrowhead) and **C)** mitochondria which are then  
698 delivered to vacuoles in gongylidia bulbs for further degradation. **D-E)** Vacuolar expansion is  
699 mediated by autophagosomes that lose their outer membrane after fusing with the vacuole.  
700 These single-membraned autophagic bodies are vesicles that can be seen inside the vacuole  
701 prior to their degradation (arrowhead). Images acquired by TEM (A-C), phase contrast  
702 microscopy (D) and confocal microscopy stained with dextran-Alexa fluor 647 (E). Scale bars A-  
703 C = 500 nm, D-E = 20  $\mu$ m.

704



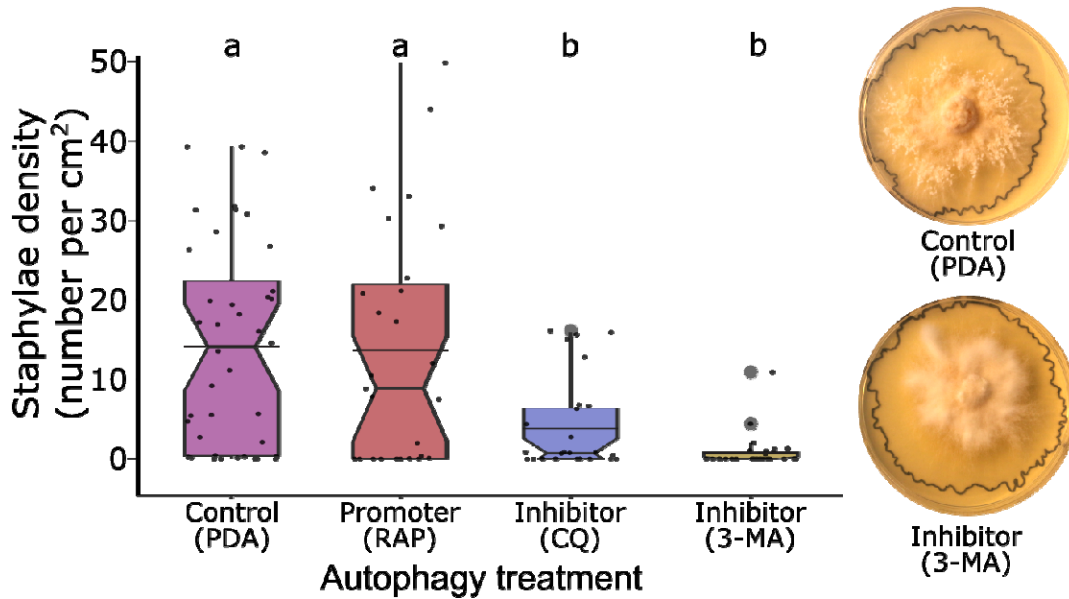

705

706 **Fig. 3: Experimental evidence that autophagic recycling of the fungal cultivar's own**  
707 **cellular material mediates gongylidia formation.** Gongylidium density was significantly  
708 inhibited when *L. gongylophorus* was grown on potato dextrose agar supplemented with one  
709 autophagy inhibitor chloroquine (CQ, n = 28) or 3-methyladenine (3-MA, n = 30)) relative to  
710 control (PDA, n = 40) and an autophagy promoter rapamycin (RAP, n = 27)). Representative  
711 Petri-dishes with control (PDA; top) and inhibition (CQ; bottom) are displayed at the right, black  
712 outlines indicate the radial growth area of cultivars and white fungal clusters in the control are  
713 the staphylococci. Different letters above the boxes indicate significant differences determined by a  
714 post-hoc Dunn's pairwise test ( $p < 0.05$ ) and horizontal bars indicate the distribution means.

715

716

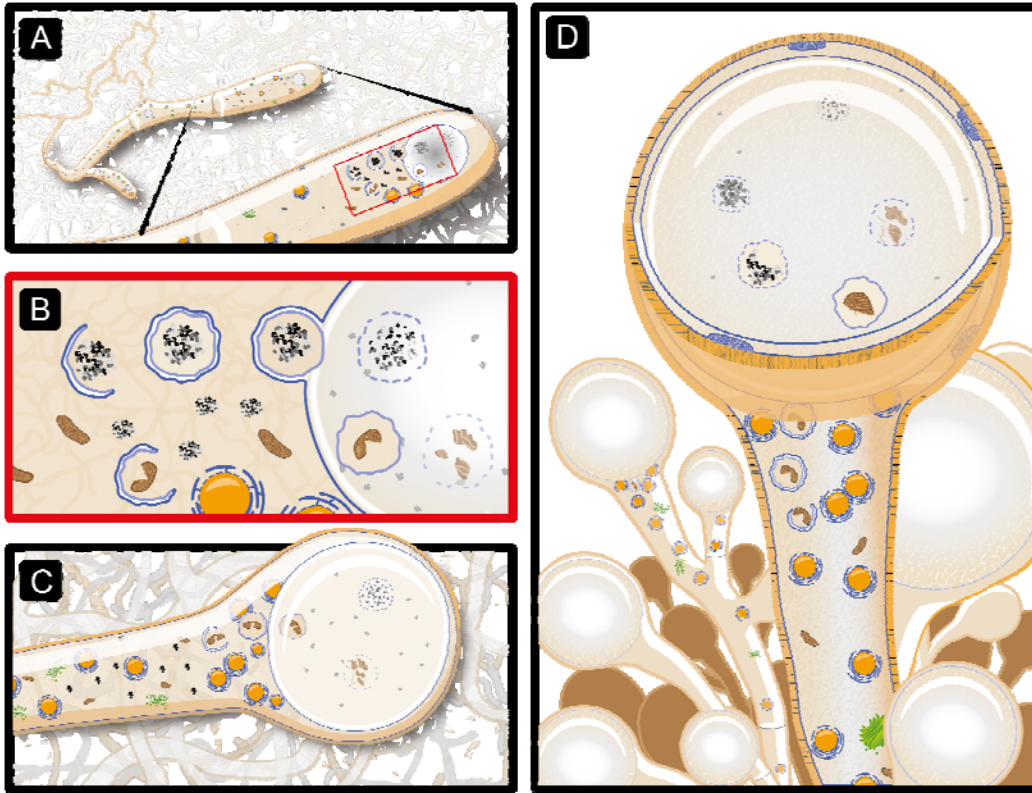

717

718 **Fig. 4: The hypothesized stages of autophagy-mediated gongylidium development. A)** An  
719 unknown mechanism (potentially starvation mediated by ant pruning [77]) triggers the widening  
720 of ordinary hyphae. As the hypha elongates, the nuclei (orange circles) naturally migrate  
721 towards the hyphal tip. **B)** Mediated primarily by an autophagic process, a large vacuole  
722 expands with the fusion of newly formed double membrane vesicles called autophagosomes  
723 (blue membraned vesicles) that sequester material present in the cytosol like glycogen (black  
724 and gray aggregates) and damaged mitochondria (brown indented ovals). This process is  
725 indicated by the proliferation of endoplasmic reticulum membranes (blue membranes around  
726 nuclei) that produce autophagosomes. **C)** The fusion of autophagosomes into vacuoles  
727 mediates their expansion and either forces the apical bulb swelling while also halting further  
728 apical growth by excluding nuclei from the hyphal tip or produce an intercalary bulb when the  
729 vacuole is located among nuclei. **D)** This process repeats in up to hundreds of adjacent hyphae  
730 that become tangled to form the staphyla.

731

732 **Table 1:** Upregulated transcripts in autophagy pathway annotated with KEGG database (see Fig. S3).

| Tissue    | KEGG     | Gene names                                                    | No. of 733 transcripts                    |
|-----------|----------|---------------------------------------------------------------|-------------------------------------------|
| Staphyiae | K06902   | ATG22; UMF1; MFS transporter, UMF1 family                     | 1734                                      |
|           | K07897   | Ypt7; RAB7A; Ras-related protein Rab-7A                       | 1                                         |
|           | K08331   | ATG13; autophagy-related protein 13                           | 1                                         |
|           | K08337   | ATG7; ubiquitin-like modifier-activating enzyme ATG7          | 3                                         |
|           | K12767   | RIM15; serine/threonine-protein kinase RIM15                  | 2                                         |
|           | K17606   | IGBP1, TAP42; immunoglobulin-binding protein 1                | 1                                         |
|           | K17888   | ATG10; ubiquitin-like-conjugating enzyme ATG10                | 1                                         |
|           | K17900   | ATG15, AUT5; lipase ATG15                                     | 1                                         |
|           | K01336   | PRB1; cerevisin                                               | 5                                         |
|           | K08341   | ATG8, GABARAP, LC3; GABA(A) receptor-associated protein       | 1                                         |
|           | K19800   | SCH9; serine/threonine protein kinase SCH9                    | 1                                         |
|           | K20177   | VPS3, TGFBRAP1; vacuolar protein sorting-associated protein 3 | 2                                         |
|           | K20195   | MON1; vacuolar fusion protein MON1                            | 2                                         |
|           | K01336   | PRB1; cerevisin                                               | 1                                         |
|           | Mycelium | K04464                                                        | MAPK7; mitogen-activated protein kinase 7 |
| K08337    |          | ATG7; ubiquitin-like modifier-activating enzyme ATG7          | 2                                         |
| K12761    |          | SNF1; carbon catabolite-derepressing protein kinase           | 1                                         |
| K17906    |          | ATG2; autophagy-related protein 2                             | 1                                         |
| K21157    |          | SAK1; SNF1-activating kinase 1                                | 1                                         |
| K06655    |          | PHO85; negative regulator of the PHO system                   | 1                                         |

735 **Supplementary figures**

736

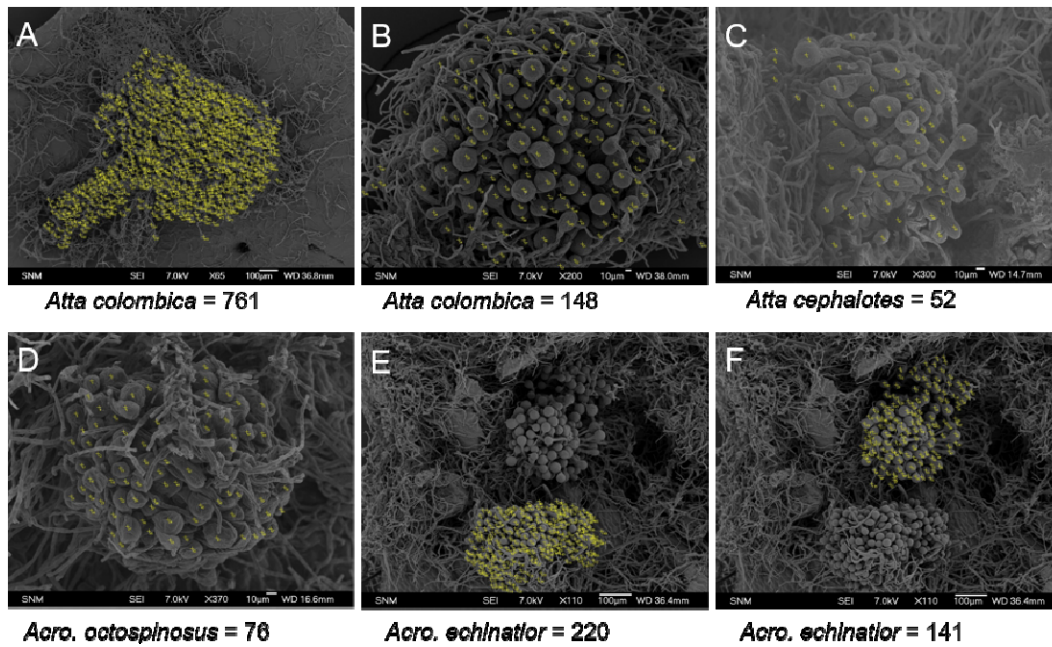

737

738 **Fig. S1: Representative counts of gongylidia per staphylae in *L. gongylophorus* from**  
739 **different leafcutter ants' species.** A) Staphylae from in vitro culture without ant manipulation.  
740 B-E) staphylae from colonies fungus garden. Yellow marks indicate individual gongylidia count  
741 on ImageJ. Scale bars sizes are indicated in each image.

742

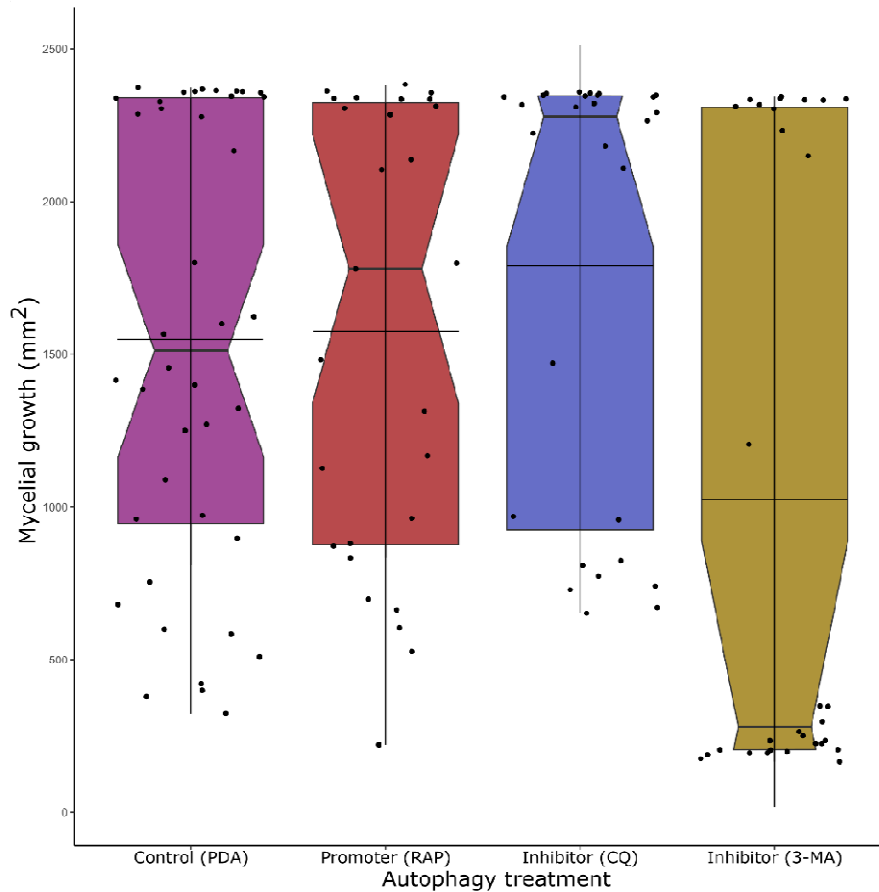

743

744 **Fig. S2: Mycelial growth distribution (area per treatment).** The mycelial growth showed  
745 significant differences between 3-MA and all other treatments (PDA:3-MA,  $p_{adj} = 0.004$ ; RAP:3-  
746 MA,  $p_{adj} = 0.015$ ; CQ:3-MA,  $p_{adj} = 0.001$ ), but no other significant pairwise comparisons. Thus,  
747 while both autophagy inhibition treatments resulted in staphyla reduction, it is possible that 3-  
748 MA negatively influenced staphyla density through unknown indirect effects on cultivar  
749 performance. Horizontal bars indicate the distribution means.

750

751



760

761 **Video S1: Time lapse of staphyla stained with dextran-Alexa Fluor 647 under confocal**  
762 **microscope over 20 minutes.** Red arrows point gongylidia in which is possible to observe  
763 autophagic bodies trapped within the vacuole. Some of these vesicles are filled with dextran  
764 and appear more fluorescent than the vacuole lumen, others are filled with non-fluorescent  
765 material and appear darker than the vacuole.

766
